# Supplementary material for: Cu2O nanoparticles sensitize TiO2/CdS nanowire arrays to prolong charge carrier lifetime and highly enhance unassisted photoelectrochemical hydrogen generation with 4.3% efficiency
Source: Royal Society of Chemistry journal article supplement (doi:10.1039/d0dt01643h), 2020-01-01

## Table of Contents

**Cu<sub>2</sub>O nanoparticles sensitize TiO<sub>2</sub>/CdS nanowire arrays to prolong charge carrier lifetime and highly enhance unassisted photoelectrochemical hydrogen generation with 4.3% efficiency**

Kangbo Jiang, Wenzhong Wang, Jun Wang, Tianyu Zhu, Lizhen Yao, Ying Cheng, Yue Wang, Yujie Liang and Junli Fu

**Cu<sub>2</sub>O nanoparticles sensitize TiO<sub>2</sub>/CdS nanowire arrays to prolong charge carrier lifetime and enhance bias-free photoelectrochemical hydrogen generation with 4.3% efficiency**

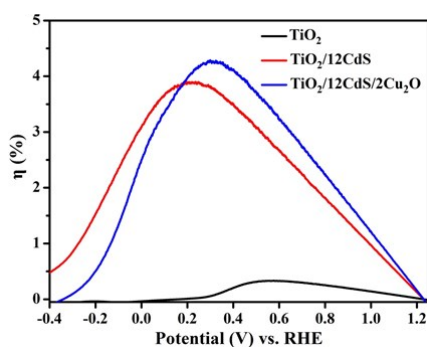

Supplement: d0dt01643h1.pdf [file d0dt01643h1.pdf]
